# Supplementary material for: Decomposition and mineralization of glyphosate herbicide in water by radical and non-radical pathways through peroxymonosulfate activation using Co3O4/g-C3N4: a comprehensive study
Source: Royal Society of Chemistry journal article supplement (doi:10.1039/d2ew00688j), 2022-11-18
Supplement: d2ew00688j1.pdf [file d2ew00688j1.pdf]

Electronic Supplementary Information

Table S1. Different AOPs for degradation of glyphosate in water

| AOPs                    | Catalyst                                                        | Reaction conditions                                                                                                                                                                                                      | Remark                                                                                                                               | Reference |
|-------------------------|-----------------------------------------------------------------|--------------------------------------------------------------------------------------------------------------------------------------------------------------------------------------------------------------------------|--------------------------------------------------------------------------------------------------------------------------------------|-----------|
| Activated catalyst (AC) | Co <sub>3</sub> O <sub>4</sub> /g-C <sub>3</sub> N <sub>4</sub> | Gly: 50 mg/L<br>Catalyst: 50 mg/L<br>PMS: 200 mg/L<br>pH 11                                                                                                                                                              | 94.28 % after 10 min<br>Main active species: O <sub>2</sub> <sup>•-</sup> ; <sup>1</sup> O <sub>2</sub><br>After five cycles: 83.56% | This work |
| Activated catalyst (AC) | Fe <sub>3</sub> Ce <sub>1</sub> O <sub>x</sub>                  | Gly: 100 mg/L<br>Catalyst: 3 g/L<br>PMS: 154 mg/L<br>pH 3                                                                                                                                                                | 100% after 16 min<br>Main active species: SO <sub>4</sub> <sup>•-</sup> and HO <sup>•</sup>                                          | [1]       |
| Activated catalyst (AC) | Cu <sup>2+</sup>                                                | Gly: 6 μM<br>Catalyst: 0.025 mM<br>Sulfite: 0.25 mM<br>pH 9                                                                                                                                                              | 71% after 5 min<br>Main active species: SO <sub>4</sub> <sup>•-</sup> and HO <sup>•</sup>                                            | [2]       |
| Electro-Fenton (EF)     | Fe <sup>2+</sup>                                                | Anode: RuO <sub>2</sub> /IrO <sub>2</sub><br>Cathode: activated carbon fibers<br>Applied current intensity: 0.36 A/cm <sup>2</sup><br>O <sub>2</sub> flow rate: 100 mL/min<br>Catalyst: 5.6 mg/L<br>Gly: 17 mg/L<br>pH 3 | 85% of after 120 min                                                                                                                 | [3]       |
| Electro-Fenton (EF)     | Fe <sup>2+</sup>                                                | Anode: TiO <sub>2</sub> /PbO <sub>2</sub><br>Cathode: Carbon felt<br>Applied current intensity: 10mA/cm <sup>2</sup><br>Catalyst: 2.8 mg/L<br>Gly: 17 mg/L<br>Na <sub>2</sub> SO <sub>4</sub> : 0.05 M<br>pH 3           | 91.91% after 40 min.<br>Main active species: HO <sup>•</sup>                                                                         | [4]       |

|                                    |                                                     |                                                                                                                                  |                                                                                                                 |     |
|------------------------------------|-----------------------------------------------------|----------------------------------------------------------------------------------------------------------------------------------|-----------------------------------------------------------------------------------------------------------------|-----|
| Catalytic wet air oxidation (cWAO) | Fe-CNF/ ACB                                         | Gly: 100 mg/L<br>Catalyst: 750 mg/L<br>pH 8.6<br>Temperature: 220 °C<br>Pressure: 25 bar                                         | 70% after 2 h<br>Main active species: HO•                                                                       | [5] |
| Catalytic wet air oxidation (cWAO) | MWCNT-Al                                            | Gly: 100 mg/L<br>Catalyst: 8 g/L<br>H <sub>2</sub> O <sub>2</sub> : 947 mg/L<br>pH 5<br>Oxygen gas flow rate: 400 mL/min<br>pH 9 | 31.5% after 2 h                                                                                                 | [6] |
| Photocatalyst (PC)                 | 10%CoS/BiOBr                                        | Gly: 17 mg/L<br>Catalyst: 400 mg/L<br>Lamp: LED (40W)                                                                            | 74.7% after 180 min<br>Main active species: electrons and holes                                                 | [7] |
| Photocatalyst (PC)                 | 1%Cu <sub>2</sub> S/Bi <sub>2</sub> WO <sub>6</sub> | Gly: 17 mg/L<br>Catalyst: 400 mg/L<br>Lamp: LED (44 W)                                                                           | 73.2% after 180 min<br>Main active species: h <sup>+</sup> , e <sup>-</sup> , and O <sub>2</sub> • <sup>-</sup> | [8] |

References:

- [1] L. Xue, L. Hao, H. Ding, R. Liu, D. Zhao, J. Fu, M. Zhang, Complete and rapid degradation of glyphosate with Fe<sub>3</sub>Ce<sub>1</sub>O<sub>x</sub> catalyst for peroxymonosulfate activation at room temperature, *Environ. Res.* 201 (2021) 111618.
- [2] L. Chen, X. Huang, M. Tang, D. Zhou, F. Wu, Rapid dephosphorylation of glyphosate by Cu-catalyzed sulfite oxidation involving sulfate and hydroxyl radicals, *Environ. Chem. Lett.* 16 (2018) 1507-1511.
- [3] H. Lan, W. He, A. Wang, R. Liu, H. Liu, J. Qu, C.P. Huang, An activated carbon fiber cathode for the degradation of glyphosate in aqueous solutions by the Electro-Fenton mode: Optimal operational conditions and the deposition of iron on cathode on electrode reusability, *Water Res.* 105 (2016) 575-582.
- [4] M.H. Tran, H.C. Nguyen, T.S. Le, V.A.D. Dang, T.H. Cao, C.K. Le, T.-D. Dang, Degradation of glyphosate herbicide by an electro-Fenton process using carbon felt cathode, *Environ. Technol.* 42 (2021) 1155-1164.
- [5] P. Gupta, K. Pandey, N. Verma, Augmented complete mineralization of glyphosate in wastewater via microbial degradation post CWAO over supported Fe-CNF, *Chem. Eng. J.* 428 (2022) 132008.
- [6] N. Tan, Z. Yang, X.-b. Gong, Z.-r. Wang, T. Fu, Y. Liu, In situ generation of H<sub>2</sub>O<sub>2</sub> using MWCNT-Al/O<sub>2</sub> system and possible application for glyphosate degradation, *Sci. Total Environ.* 650 (2019) 2567-2576.
- [7] Q.-Y. Tang, M.-J. Yang, S.-Y. Yang, Y.-H. Xu, Enhanced photocatalytic degradation of glyphosate over 2D CoS/BiOBr heterojunctions under visible light irradiation, *J. Hazard. Mater.* 407 (2021) 124798.
- [8] Q.-Y. Tang, W.-F. Chen, Y.-R. Lv, S.-Y. Yang, Y.-H. Xu, Z-scheme hierarchical Cu<sub>2</sub>S/Bi<sub>2</sub>WO<sub>6</sub> composites for improved photocatalytic activity of glyphosate degradation under visible light irradiation, *Sep. Purif. Technol.* 236 (2020) 116243.

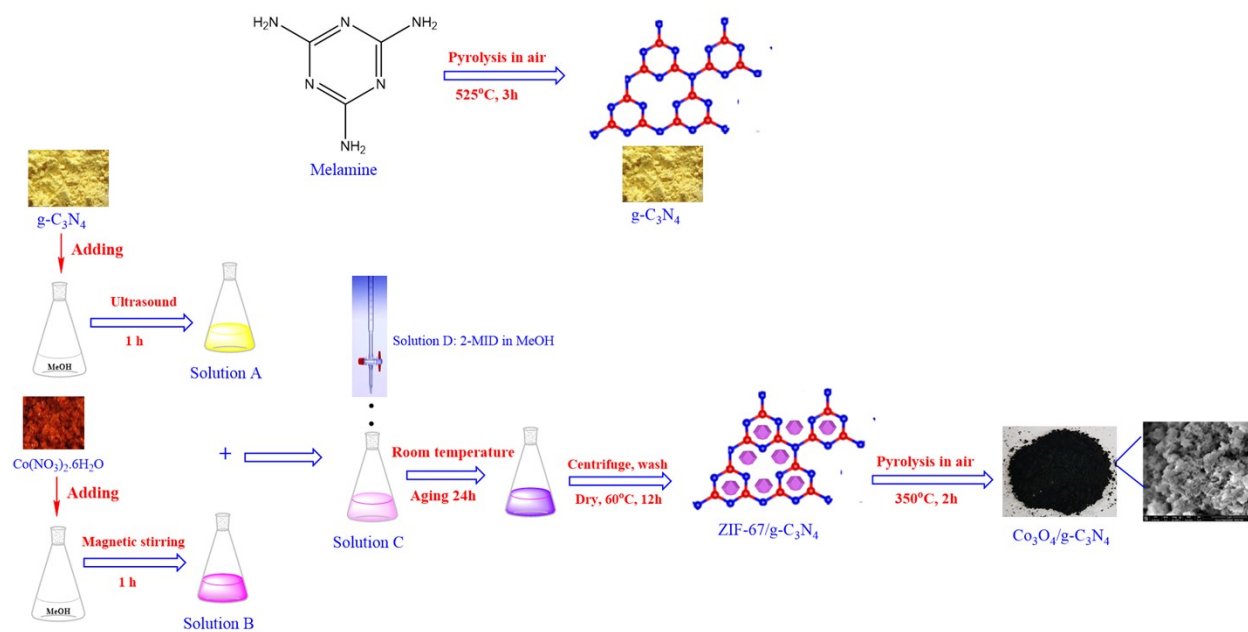

Figure S1. Procedure for the synthesis of  $\text{Co}_3\text{O}_4/\text{g-C}_3\text{N}_4$  composite

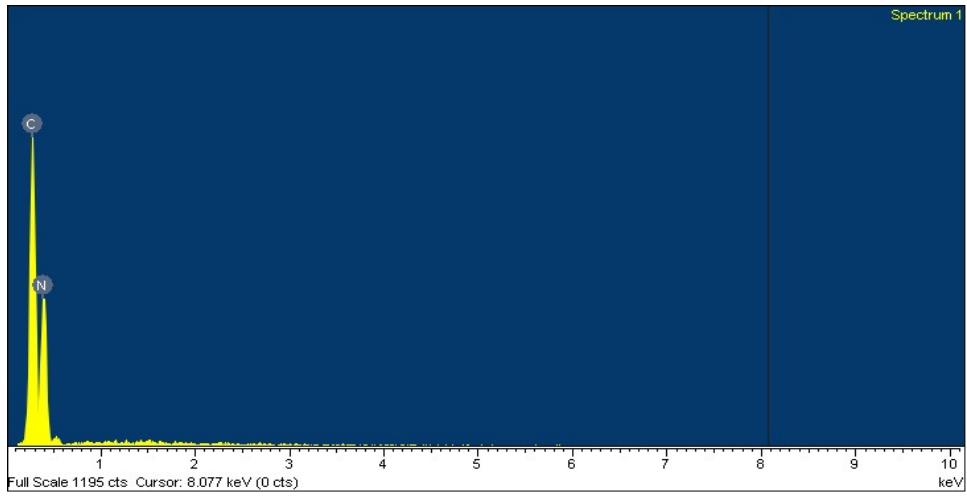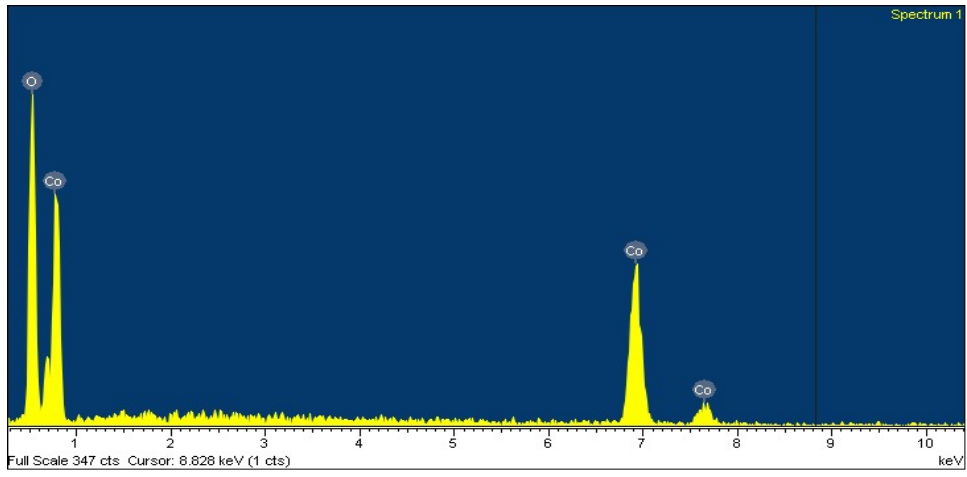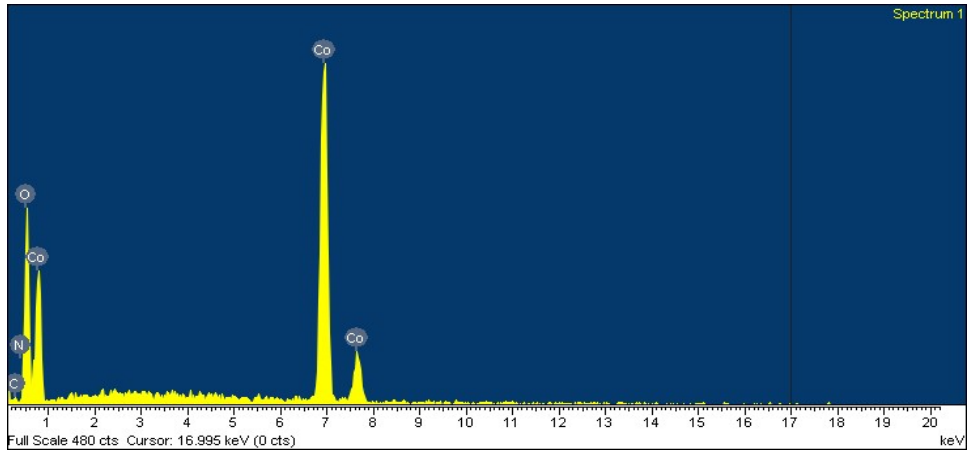

Figure S2. EDX results of (a)  $g\text{-C}_3\text{N}_4$ , (b)  $\text{Co}_3\text{O}_4$ , and (c)  $\text{Co}_3\text{O}_4/g\text{-C}_3\text{N}_4$  materials

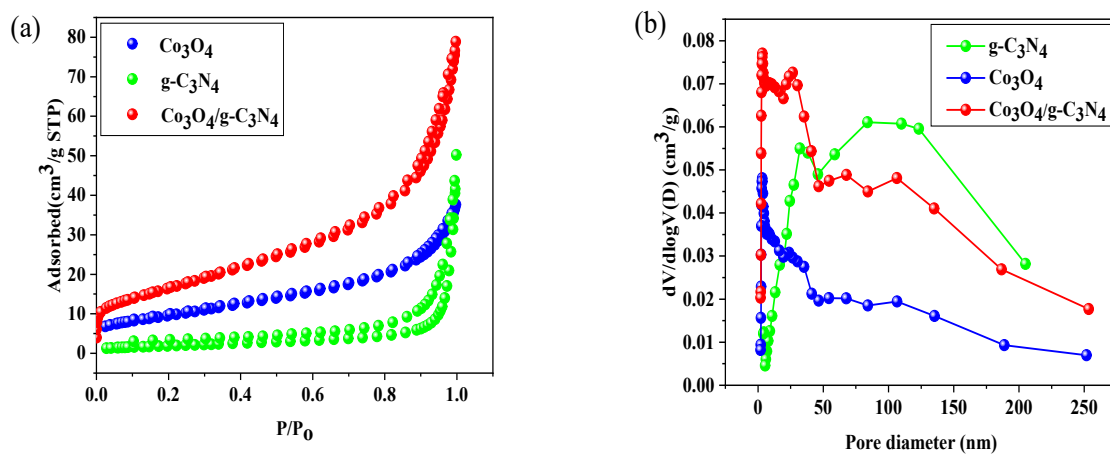

Figure S3. (a)  $N_2$  adsorption and desorption isotherms and (b) pore size distributions of  $Co_3O_4$ ,  $g-C_3N_4$ , and  $Co_3O_4/g-C_3N_4$  (10%)

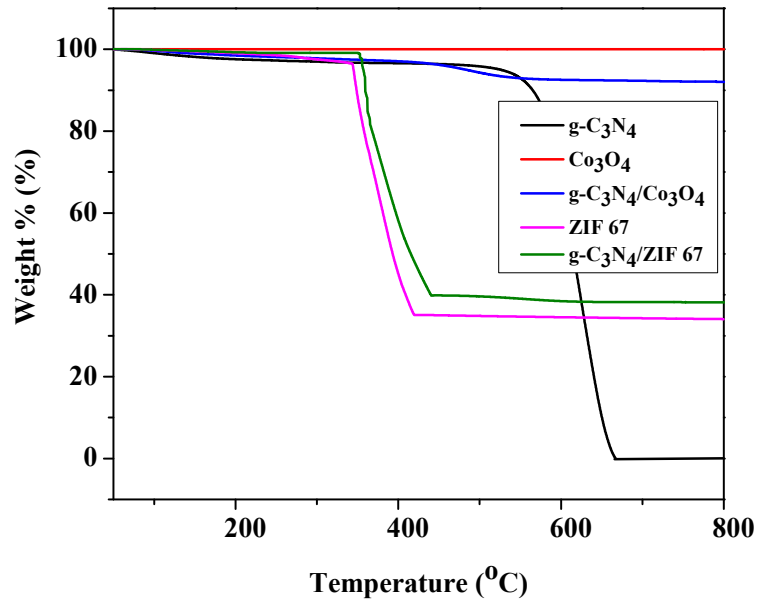

Figure S4. TGA curves of g-C<sub>3</sub>N<sub>4</sub>, ZIF-67, g-C<sub>3</sub>N<sub>4</sub>/ZIF-67, Co<sub>3</sub>O<sub>4</sub>, and Co<sub>3</sub>O<sub>4</sub>/g-C<sub>3</sub>N<sub>4</sub>

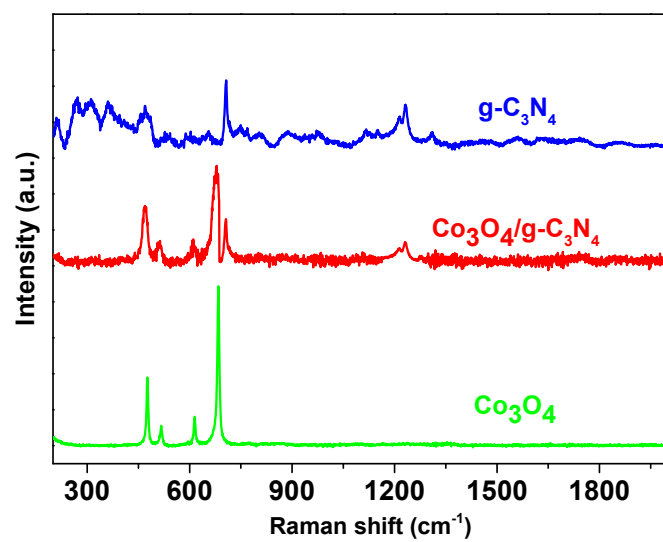

Figure S5. Raman spectra of Co<sub>3</sub>O<sub>4</sub>, g-C<sub>3</sub>N<sub>4</sub> and Co<sub>3</sub>O<sub>4</sub>/g-C<sub>3</sub>N<sub>4</sub> (10%)

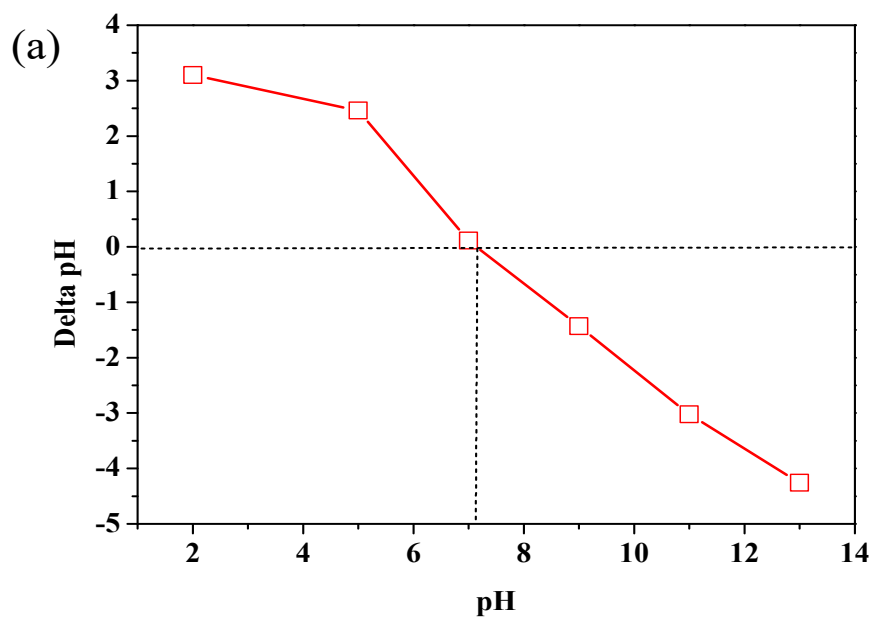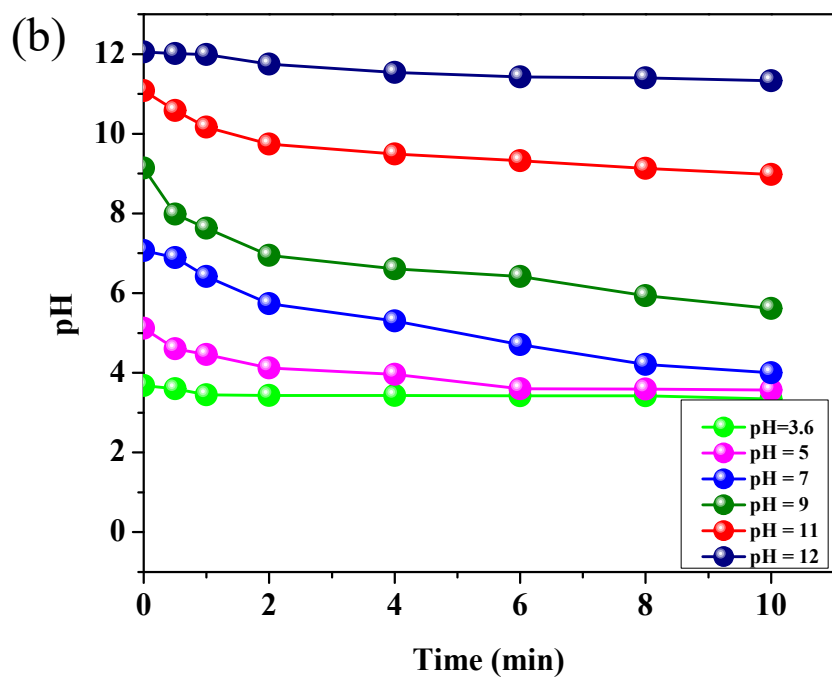

Figure S6. (a) The  $\text{pH}_{\text{pzc}}$  of  $\text{Co}_3\text{O}_4/\text{g-C}_3\text{N}_4$  material and (b) the change of pH during the reaction time

(Reaction condition: 50 mgGly/L, 50 mgcatalyst/L, 200 mgPMS/L, 25 °C)



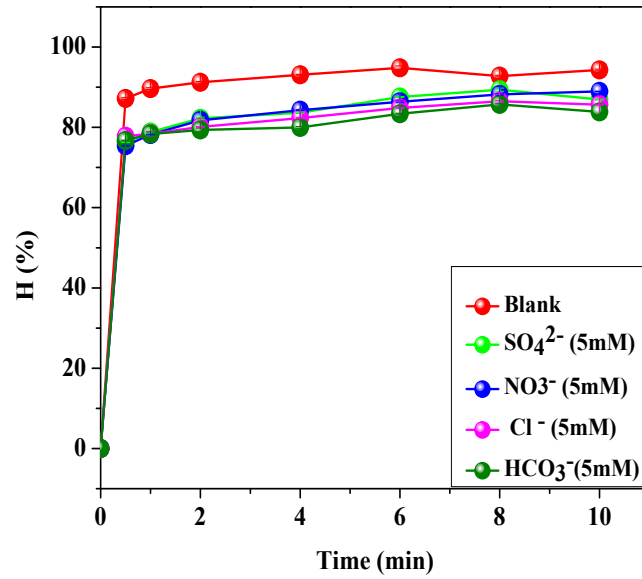

Figure S7. Effect of co-existing ions on the glyphosate decomposing at low ion concentration  
(Reaction condition: 50 mgGly/L, 50 mgcatalyst/L, 200 mgPMS/L, pH 11, 25 °C)

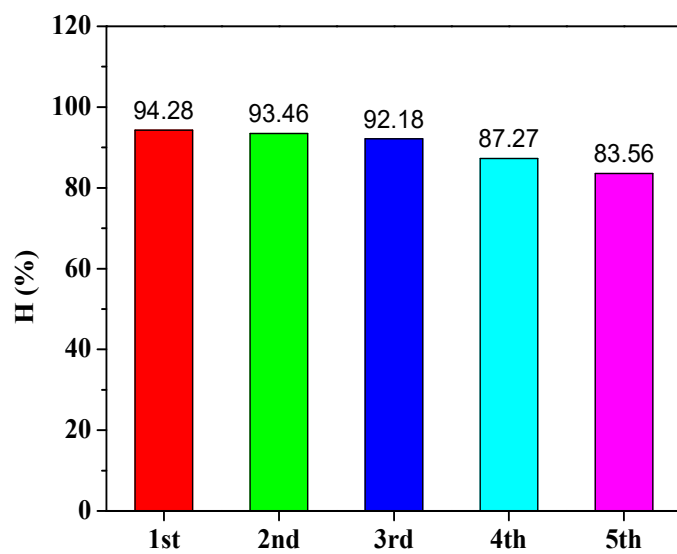

Figure S8. Glyphosate efficiency after 5 consecutive cycles of reuse  
(Reaction condition: 50 mgGly/L, 50 mgcatalyst/L, 200 mgPMS/L, pH 11, 25 °C)

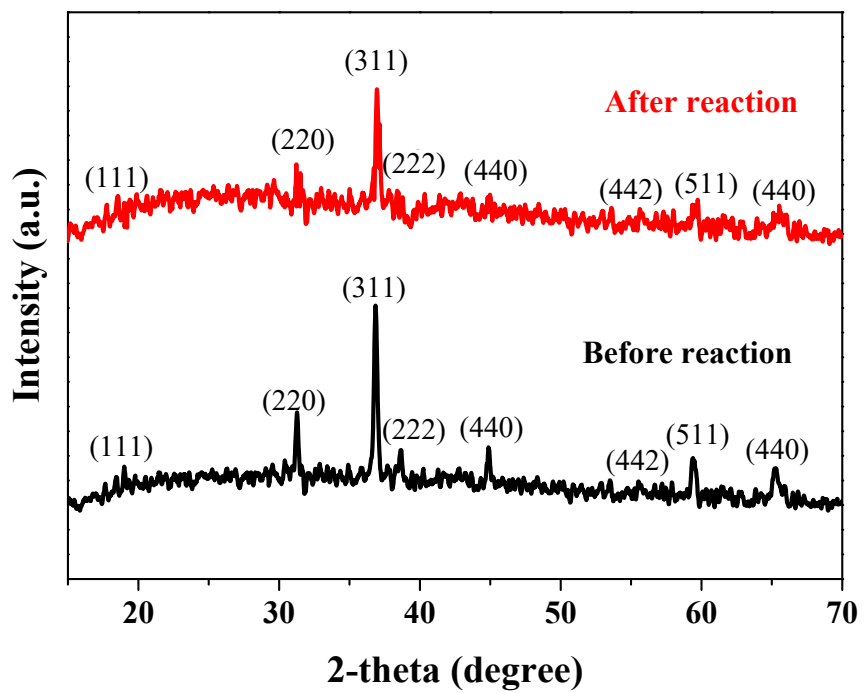

Figure S9. XRD patterns of fresh and used  $\text{Co}_3\text{O}_4/\text{g-C}_3\text{N}_4$  (10%)

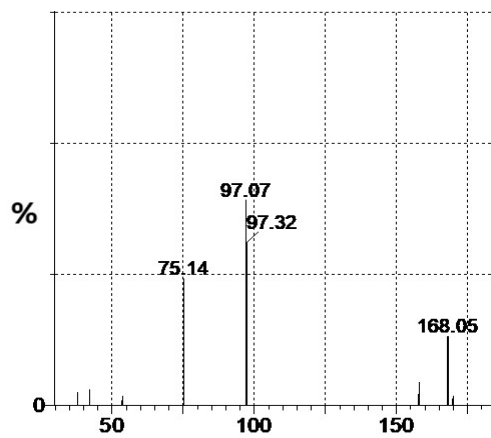

Figure S10. MS result of glyphosate solution decomposed by  $\text{Co}_3\text{O}_4/\text{g-C}_3\text{N}_4/\text{PMS}$

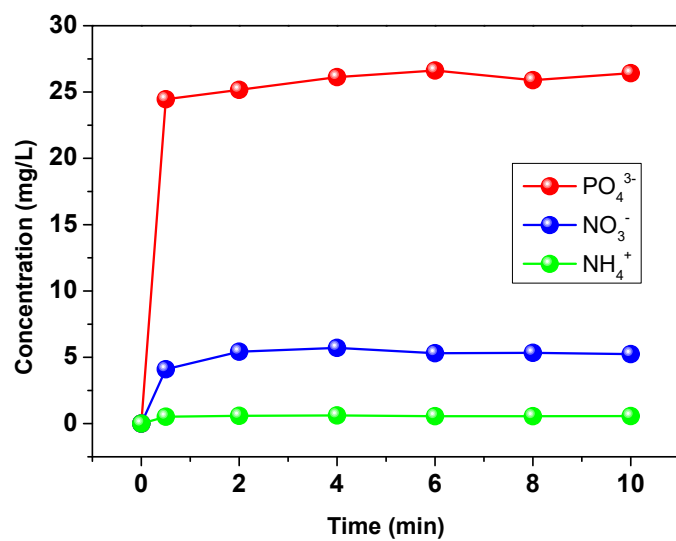

Figure S11. Concentration of ions during the glyphosate decomposition

(Reaction condition: 50 mgGly/L, 50 mgcatalyst/L, 200 mgPMS/L, pH 11, 25 °C)
